# Supplementary material
Source: MDPI journal article supplement (https://www.mdpi.com/1999-4907/15/3/549)
Supplement: s1 [file s1 › forests-2871246-supplementary.pdf]

# Impacts of Compound Hot–Dry Events on Vegetation Productivity over Northern East Asia

- <sup>1</sup> Collaborative Innovation Center on Forecast and Evaluation of Meteorological Disasters/Key Laboratory of Meteorological Disaster, Ministry of Education/Joint International Research Laboratory of Climate and Environment Change (ILCEC), Nanjing University of Information Science & Technology (NUIST), Nanjing 210044, China
- <sup>2</sup> Key Laboratory of Watershed Geographic Sciences, Nanjing Institute of Geography and Limnology, Chinese Academy of Sciences, Nanjing 210008, China
- \* Correspondence: yum@nuist.edu.cn; Tel.: +86-137-7650-3727

## Supplementary Materials

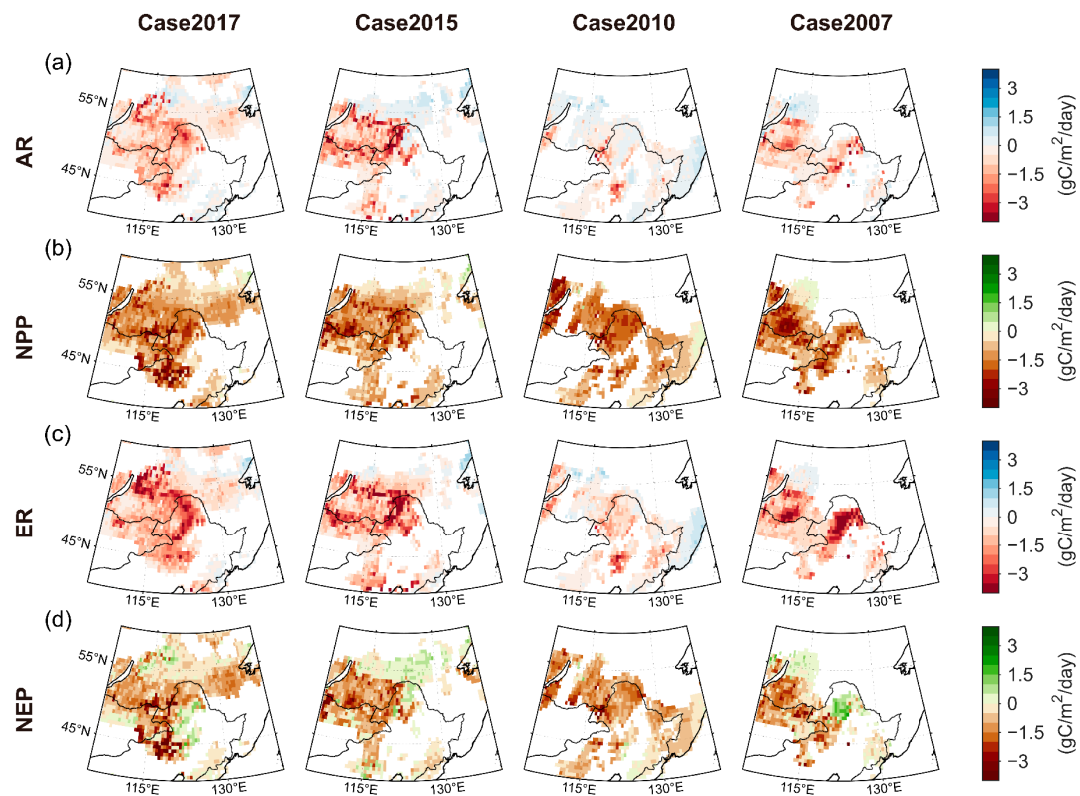

**Figure S1.** Changes in autotrophic respiration (AR) (a), net primary productivity (NPP) (b), ecosystem respiration (ER) (c), and net ecosystem productivity (NEP) (d) during the four compound hot–dry (CHD) events, calculated by subtracting the results of the *SE\_Clim* experiment from those of the *Control* experiment.

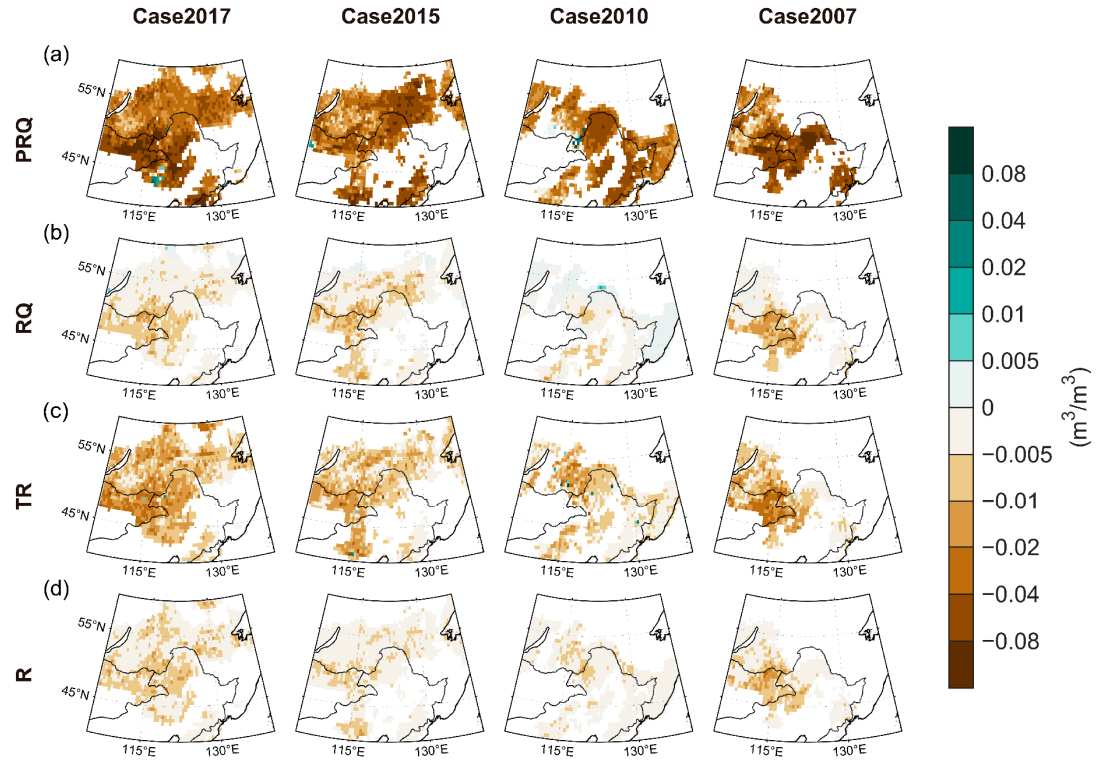

**Figure S2.** Changes in soil moisture (SM) caused by the combined effects of (a) precipitation, incident radiation, and 2 m humidity (PRQ), (b) incident radiation and 2 m humidity (RQ), and (c) 2 m temperature and incident radiation (TR), and (d) the individual effect of incident radiation (R) during the four CHD events. These SM changes were calculated by subtracting the results of the *SE\_Clim* experiment from the results of the *SE\_PRQ*, *SE\_RQ*, *SE\_TR*, and *SE\_R* experiments, respectively.

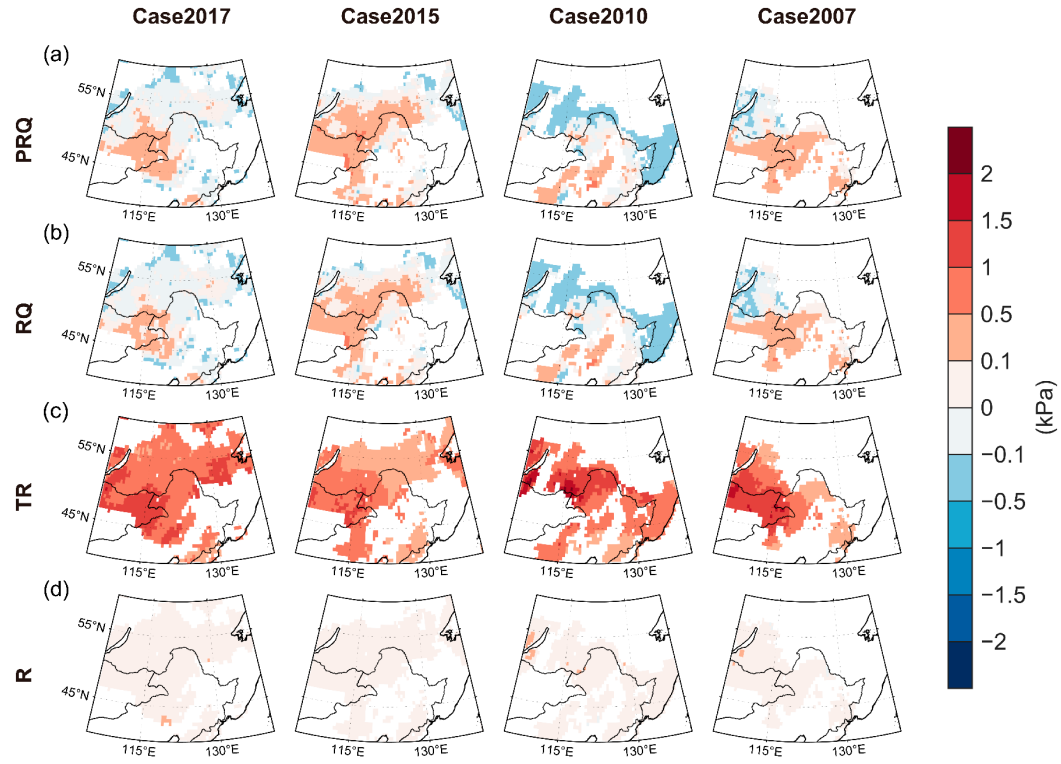

**Figure S3.** Same as Figure S2, but for vapor pressure deficit (VPD). PRQ: the combined effect of precipitation, radiation and humidity; RQ: the combined effect of radiation and humidity; TR: the combined effect of temperature and radiation; R: the individual effect of incident radiation.

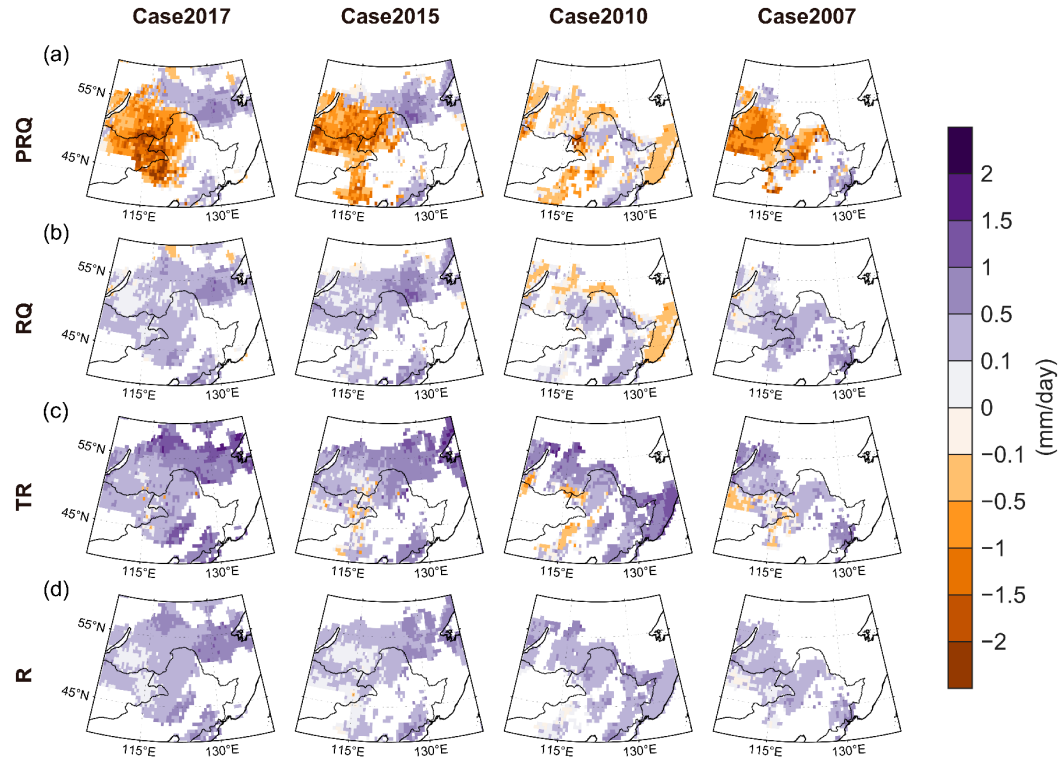

**Figure S4.** Same as Figure S2, but for evapotranspiration (ET). PRQ: the combined effect of precipitation, radiation and humidity; RQ: the combined effect of radiation and humidity; TR: the combined effect of temperature and radiation; R: the individual effect of incident radiation.

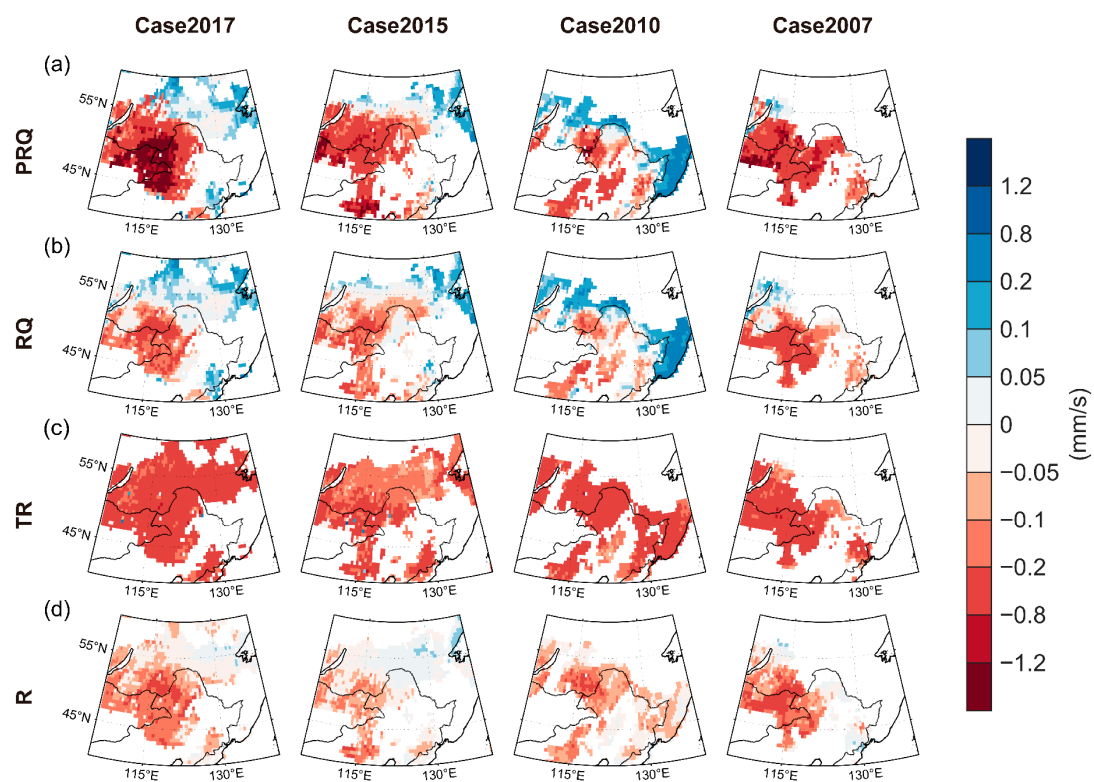

**Figure S5.** Same as Figure S2, but for canopy conductance ( $G_c$ ). PRQ: the combined effect of precipitation, radiation and humidity; RQ: the combined effect of radiation and humidity; TR: the combined effect of temperature and radiation; R: the individual effect of incident radiation.

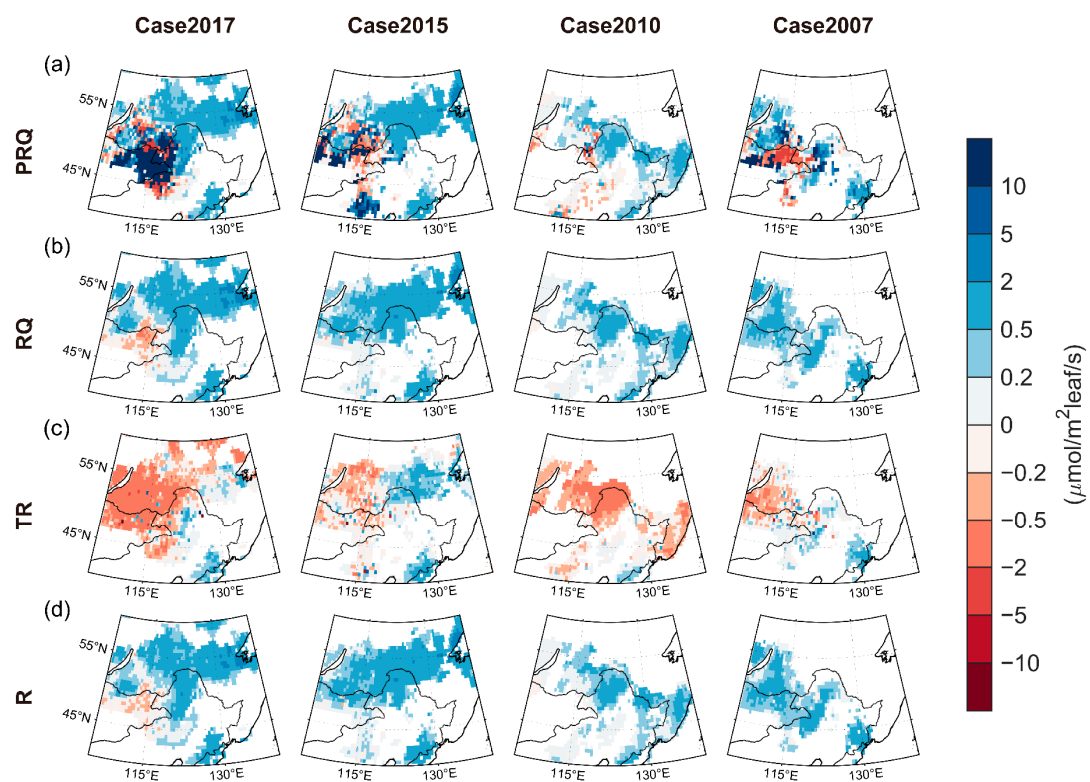

**Figure S6.** Same as Figure S2, but for maximum carboxylation rate ( $V_{cmax}$ ). PRQ: the combined effect of precipitation, radiation and humidity; RQ: the combined effect of radiation and humidity; TR: the combined effect of temperature and radiation; R: the individual effect of incident radiation.

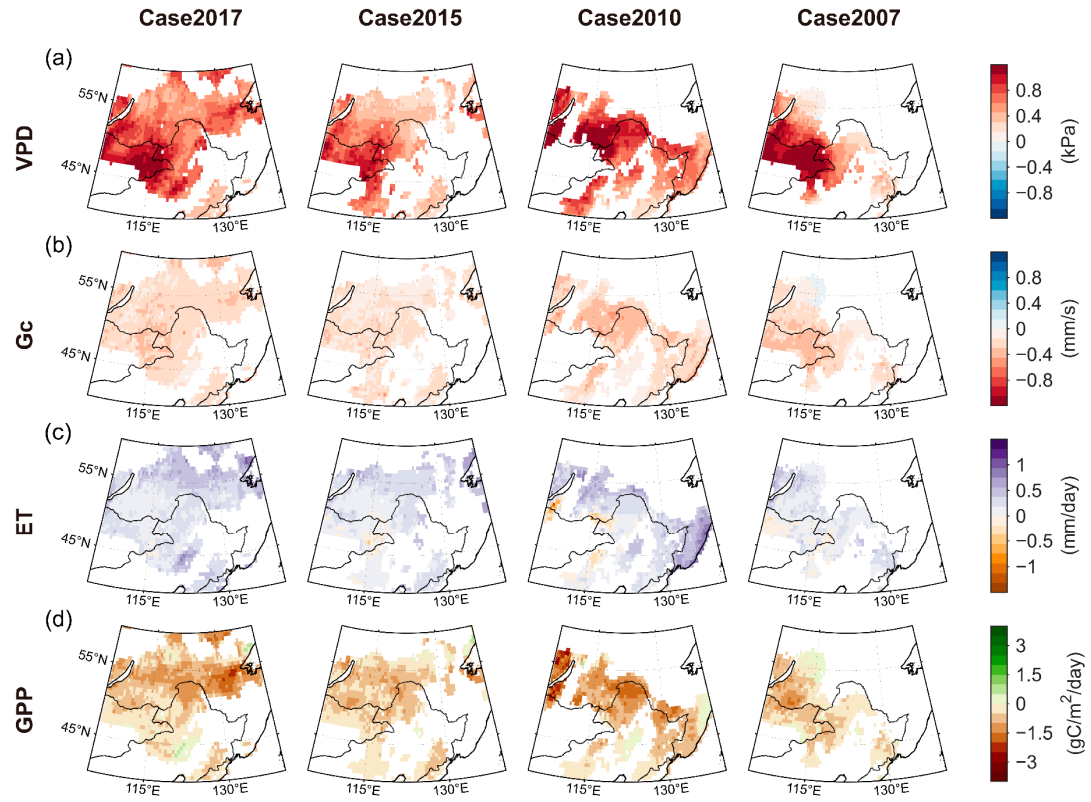

**Figure S7.** The eco-hydrological response of the 2 m temperature's (T) effect, calculated as  $SE\_T$  minus  $SE\_Clim$ . VPD, vapor pressure deficit;  $G_c$ , canopy conductance; ET, evapotranspiration; GPP, gross primary productivity.

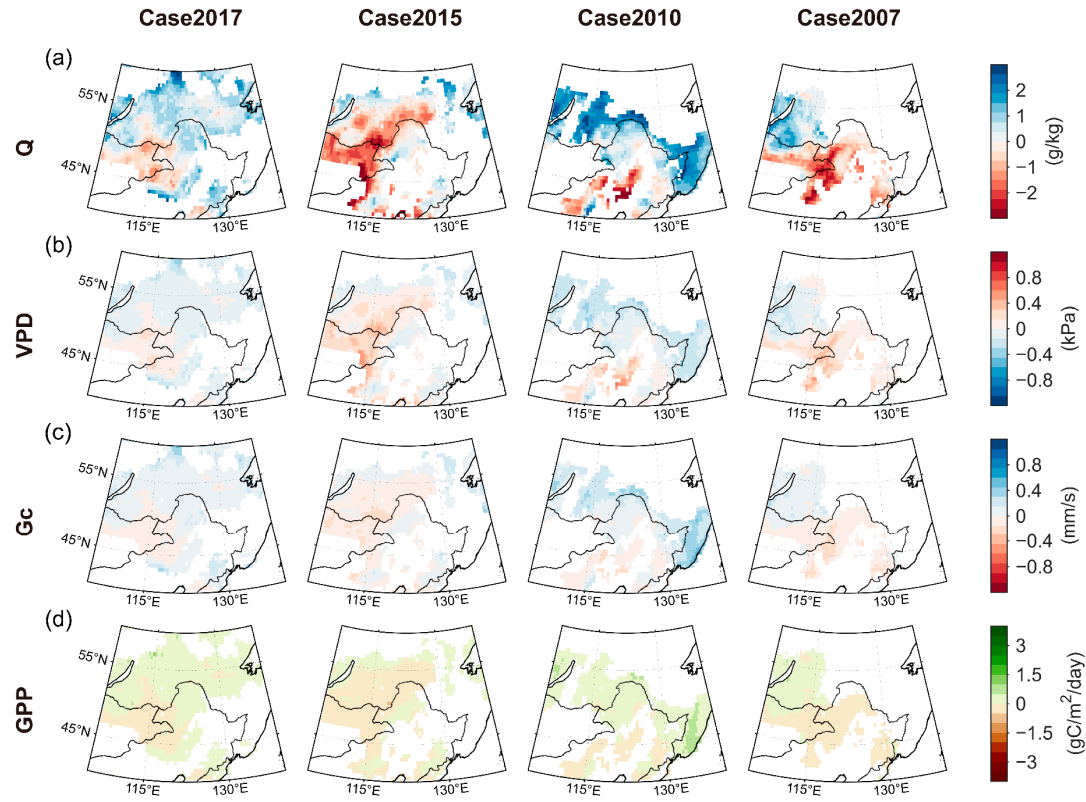

**Figure S8.** The eco-hydrological response of 2 m specific humidity's (Q) effect, calculated as  $SE_Q$  minus  $SE_{Clim. Q}$ . Q, 2 m specific humidity; VPD, vapor pressure deficit;  $G_c$ , canopy conductance; GPP, gross primary productivity.
